# Supplementary material for: Abemaciclib does not increase the corrected QT interval in healthy participants
Source: PubMed Central journal article supplement — Clin Transl Sci. 2023 Jul 4;16(9):1617–27. doi: 10.1111/cts.13573 (PMC10499409; doi:10.1111/cts.13573), 2023-07-04
Supplement: CTS-16-1617-s002.pdf [file CTS-16-1617-s002.pdf]

**Figure S1- CONSORT flowchart**

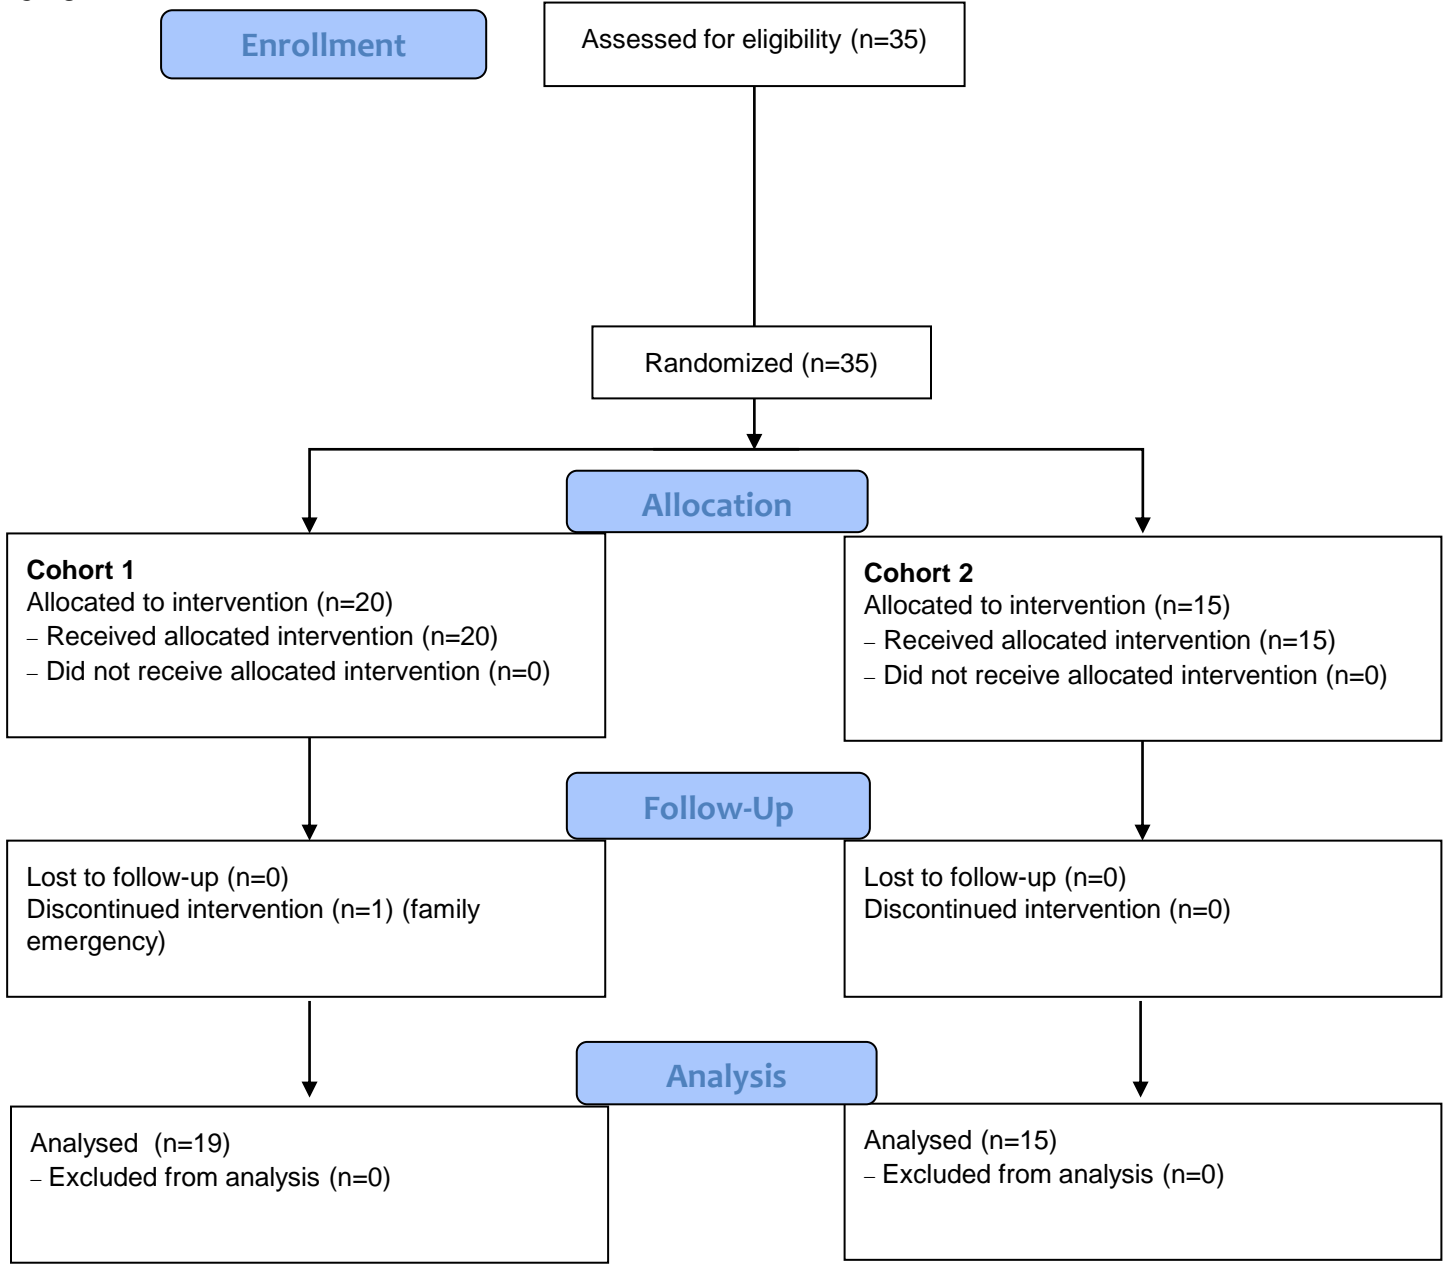

A CONSORT flow diagram showing the number of participants assessed for eligibility, randomized, allocated to intervention, lost to follow-up, and included in analysis. CONSORT – Consolidated Standards of Reporting Trials.
